# Supplementary material for: Randomized Controlled Trial of the Electrocardiographic Effects of Four Antimalarials for Pregnant Women with Uncomplicated Malaria on the Thailand-Myanmar Border
Source: PubMed Central journal article supplement (PMC8097415; doi:10.1128/aac.02473-20), 2021-03-18
Supplement: AAC.02473-20-s0002.pdf [file AAC.02473-20-s0002.pdf]

**Supplementary Table 1. Baseline characteristics comparing those who were assessed by ECG and those who were not**

| Characteristic              | ECG assessed (ACTs) |                   | ECG not-assessed (ACTs) |                   | ECG assessed (CHQ) |                   | ECG not-assessed (CHQ) |                   |
|-----------------------------|---------------------|-------------------|-------------------------|-------------------|--------------------|-------------------|------------------------|-------------------|
|                             | N                   | Mean (SD) / % (N) | N                       | Mean (SD) / % (N) | N                  | Mean (SD) / % (N) | N                      | Mean (SD) / % (N) |
| Age (years)                 | 256                 | 25.5 (6.9)        | 255                     | 26.2 (8.1)        | 18                 | 25.1 (7.6)        | 31                     | 25.5 (6.9)        |
| Gravidity                   | 256                 | 2.9 (2.0)         | 255                     | 3.1 (2.5)         | 18                 | 3.1 (2.0)         | 31                     | 2.7 (1.9)         |
| Height (cm)                 | 256                 | 151.1 (5.6)       | 255                     | 150.6 (8.2)       | 18                 | 150.3 (5.4)       | 31                     | 149.0 (19.0)      |
| Smoking                     | 256                 | 20.3% (52)        | 255                     | 19.2% (49)        | 18                 | 22.2% (4)         | 31                     | 16.1% (5)         |
| Gestational age (weeks)     | 256                 | 25.6 (8.4)        | 255                     | 25.9 (7.9)        | 18                 | 28.7 (6.1)        | 31                     | 24.5 (10.4)       |
| Weight (kg)                 | 256                 | 52.0 (7.9)        | 255                     | 51.5 (7.3)        | 17                 | 55.1 (7.4)        | 31                     | 50.7 (8.7)        |
| Fever (>37.5°C)             | 256                 | 31.6% (81)        | 255                     | 23.1% (59)        | 18                 | 16.7% (3)         | 31                     | 22.6% (7)         |
| Pulse rate (/beats per min) | 254                 | 91.3 (12.3)       | 246                     | 89.8 (10.8)       | 18                 | 84.3 (9.2)        | 31                     | 89.9 (15.2)       |
| Haematocrit (%)             | 256                 | 32.5 (3.8)        | 255                     | 31.8 (4.2)        | 18                 | 31.8 (2.6)        | 31                     | 33.1 (2.9)        |
| Malaria species             | 256                 |                   | 255                     |                   | 18                 |                   | 31                     |                   |
| falciparum mono-infection   |                     | 30.1% (77)        |                         | 25.5% (65)        |                    | 0.0% (0)          |                        | 0.0% (0)          |
| vivax mono-infection        |                     | 67.6% (173)       |                         | 70.6% (180)       |                    | 100.0% (18)       |                        | 100.0% (31)       |
| falciparum + vivax          |                     | 2.0% (5)          |                         | 3.9% (10)         |                    | 0.0% (0)          |                        | 0.0% (0)          |
| malariae mono-infection     |                     | 0.4% (1)          |                         | 0.2% (0)          |                    | 0.0% (0)          |                        | 0.0% (0)          |
| Asexual parasite load       | 256                 | 10962.0 (22157.2) | 255                     | 11257.0 (25512.7) | 18                 | 2696.0 (6895.7)   | 31                     | 6129.9 (17947.1)  |
| Presence of gametocyte      | 256                 | 46.9% (120)       | 255                     | 53.7% (137)       | 18                 | 72.2% (13)        | 31                     | 74.2% (23)        |
| Anorexia                    | 256                 | 38.7% (99)        | 254                     | 49.2% (125)       | 18                 | 22.2% (4)         | 30                     | 13.3% (4)         |
| Nausea                      | 256                 | 34.4% (88)        | 255                     | 31.4% (80)        | 18                 | 0.0% (0)          | 30                     | 10.0% (3)         |
| Vomiting                    | 256                 | 17.2% (44)        | 255                     | 19.2% (49)        | 18                 | 0.0% (0)          | 30                     | 6.7% (2)          |
| Dizziness                   | 256                 | 64.5% (165)       | 255                     | 59.6% (152)       | 18                 | 50.0% (9)         | 30                     | 43.3% (13)        |
| Diarrhoea                   | 256                 | 2.3% (6)          | 255                     | 1.6% (4)          | 18                 | 0.0% (0)          | 30                     | 0.0% (0)          |
| Palpitation                 | 256                 | 34.0% (87)        | 255                     | 30.2% (77)        | 18                 | 0.0% (0)          | 30                     | 13.3% (4)         |
| Fatigue                     | 256                 | 53.9% (138)       | 255                     | 42.0% (107)       | 18                 | 50.0% (9)         | 30                     | 20.0% (6)         |
| Treatment                   | 256                 |                   | 255                     |                   | -                  |                   | -                      |                   |
| AL+                         |                     | 33.6% (86)        |                         | 32.9% (84)        |                    |                   |                        |                   |
| ASMQ                        |                     | 34.4% (88)        |                         | 32.9% (84)        |                    |                   |                        |                   |
| DP                          |                     | 32.0% (82)        |                         | 34.1% (87)        |                    |                   |                        |                   |

ACTs: artemisinin-based combination therapies, AL+: extended artemether-lumefantrine, ASMQ: artesunate-mefloquine, CHQ: chloroquine, DP: dihydroartemisinin-piperaquine, ECG: electrocardiogram, SD: standard deviation.

**Supplementary Table 2. QT interval on day 0, day peak and day 7 by different correction methods for each treatment**

| Measurement       | All   |                             | AL+   |                             | ASMQ  |                             | DP    |                             | CHQ   |                             |
|-------------------|-------|-----------------------------|-------|-----------------------------|-------|-----------------------------|-------|-----------------------------|-------|-----------------------------|
|                   | Total | Mean (SD)<br>Range          | Total | Mean (SD)<br>Range          | Total | Mean (SD)<br>Range          | Total | Mean (SD)<br>Range          | Total | Mean (SD)<br>Range          |
| <b>Day 0</b>      |       |                             |       |                             |       |                             |       |                             |       |                             |
| Heart rate (/min) | 268   | 93.4 (16.2)<br>58–159       | 83    | 96.2 (17.3)<br>63–159       | 78    | 95.6 (16.2)<br>61–137       | 86    | 90.3 (15.2)<br>58–132       | 19    | 86.8 (12.6)<br>61–112       |
| QT uncorrected    | 268   | 334.3 (27.4)<br>250.0–415.0 | 83    | 330.4 (30.5)<br>250.0–390.0 | 78    | 332.6 (26.4)<br>275.0–415.0 | 86    | 337.6 (26.0)<br>280.0–395.0 | 19    | 342.4 (21.6)<br>300.0–380.0 |
| QTc Fridericia    | 268   | 384.8 (20.4)<br>322.7–436.3 | 83    | 383.8 (21.7)<br>322.7–428.3 | 78    | 385.9 (21.2)<br>335.2–431.9 | 86    | 384.5 (19.3)<br>338.2–436.3 | 19    | 385.6 (17.5)<br>348.5–423.4 |
| QTc Bazett        | 268   | 413.4 (23.4)<br>355.9–486.7 | 83    | 414.1 (22.0)<br>355.9–467.1 | 78    | 416.2 (25.9)<br>360.1–486.7 | 86    | 410.8 (22.9)<br>359.1–478.5 | 19    | 409.6 (21.6)<br>360.9–446.9 |
| QTcP              | 268   | 392.8 (20.6)<br>334.7–447.2 | 83    | 392.2 (21.2)<br>334.7–439.1 | 78    | 394.3 (22.0)<br>343.9–446.9 | 86    | 391.8 (19.7)<br>344.1–447.2 | 19    | 392.3 (18.2)<br>352.0–430.0 |
| <b>Day peak</b>   |       |                             |       |                             |       |                             |       |                             |       |                             |
| Heart rate (/min) | 254   | 78.6 (11.8)<br>48–120       | 82    | 78.7 (13.0)<br>48–111       | 77    | 79.9 (12.8)<br>57–120       | 79    | 77.7 (10.1)<br>59–107       | 16    | 76.8 (8.3)<br>59–90         |
| QT uncorrected    | 254   | 367.1 (28.1)<br>285.0–445.0 | 82    | 361.5 (28.9)<br>290.0–435.0 | 77    | 359.8 (27.5)<br>285.0–420.0 | 79    | 377.8 (25.5)<br>300.0–445.0 | 16    | 377.8 (21.7)<br>335.0–410.0 |
| QTc Fridericia    | 254   | 399.6 (21.1)<br>342.6–461.9 | 82    | 393.1 (18.9)<br>352.3–438.2 | 77    | 393.6 (20.8)<br>342.6–447.0 | 79    | 410.2 (19.9)<br>363.7–461.9 | 16    | 409.0 (15.2)<br>362.5–425.3 |
| QTc Bazett        | 254   | 417.3 (23.0)<br>360.1–493.3 | 82    | 410.5 (21.4)<br>360.6–470.6 | 77    | 412.1 (23.0)<br>360.1–471.5 | 79    | 427.7 (21.6)<br>377.6–493.3 | 16    | 425.7 (16.7)<br>377.1–444.1 |
| QTcP              | 254   | 404.5 (21.2)<br>347.5–470.7 | 82    | 398.0 (18.9)<br>355.6–447.3 | 77    | 398.8 (21.0)<br>347.5–451.8 | 79    | 415.1 (20.0)<br>373.3–470.7 | 16    | 413.7 (15.2)<br>366.7–428.0 |
| <b>Day 7</b>      |       |                             |       |                             |       |                             |       |                             |       |                             |
| Heart rate (/min) | 226   | 86.2 (12.9)<br>52–124       | 71    | 86.9 (13.3)<br>52–124       | 68    | 83.1 (12.4)<br>58–112       | 67    | 86.9 (13.0)<br>65–123       | 20    | 92.2 (9.8)<br>75–109        |
| QT uncorrected    | 226   | 346.0 (26.7)<br>285.0–420.0 | 71    | 346.3 (28.9)<br>290.0–420.0 | 68    | 352.2 (26.9)<br>285.0–410.0 | 67    | 341.5 (26.4)<br>290.0–400.0 | 20    | 339.5 (12.0)<br>320.0–360.0 |
| QTc Fridericia    | 226   | 388.3 (19.1)<br>335.7–429.3 | 71    | 389.3 (18.2)<br>349.6–429.3 | 68    | 390.5 (20.2)<br>335.7–428.4 | 67    | 384.3 (19.6)<br>336.9–423.7 | 20    | 391.0 (15.5)<br>350.8–416.4 |
| QTc Bazett        | 226   | 411.8 (21.4)<br>352.2–460.6 | 71    | 413.3 (18.9)<br>380.8–460.6 | 68    | 411.6 (23.1)<br>352.2–456.0 | 67    | 408.0 (21.6)<br>357.0–456.0 | 20    | 419.9 (21.7)<br>367.3–454.1 |
| QTcP              | 226   | 394.9 (19.2)<br>340.3–434.5 | 71    | 396.0 (17.8)<br>359.1–434.5 | 68    | 396.4 (20.5)<br>340.3–431.9 | 67    | 390.9 (19.7)<br>342.6–429.6 | 20    | 399.1 (17.0)<br>355.5–426.9 |

AL+: extended artemether-lumefantrine, ASMQ: artesunate-mefloquine, CHQ; chloroquine, Δ: difference, DP: dihydroartemisinin-piperaquine, QTc Fridericia: QT interval corrected by Fridericia method, QTc Bazett: QT interval corrected by Bazett method, QTcP: QT interval corrected by population-based correction (QT/RR<sup>0.381</sup>), SD: standard deviation.

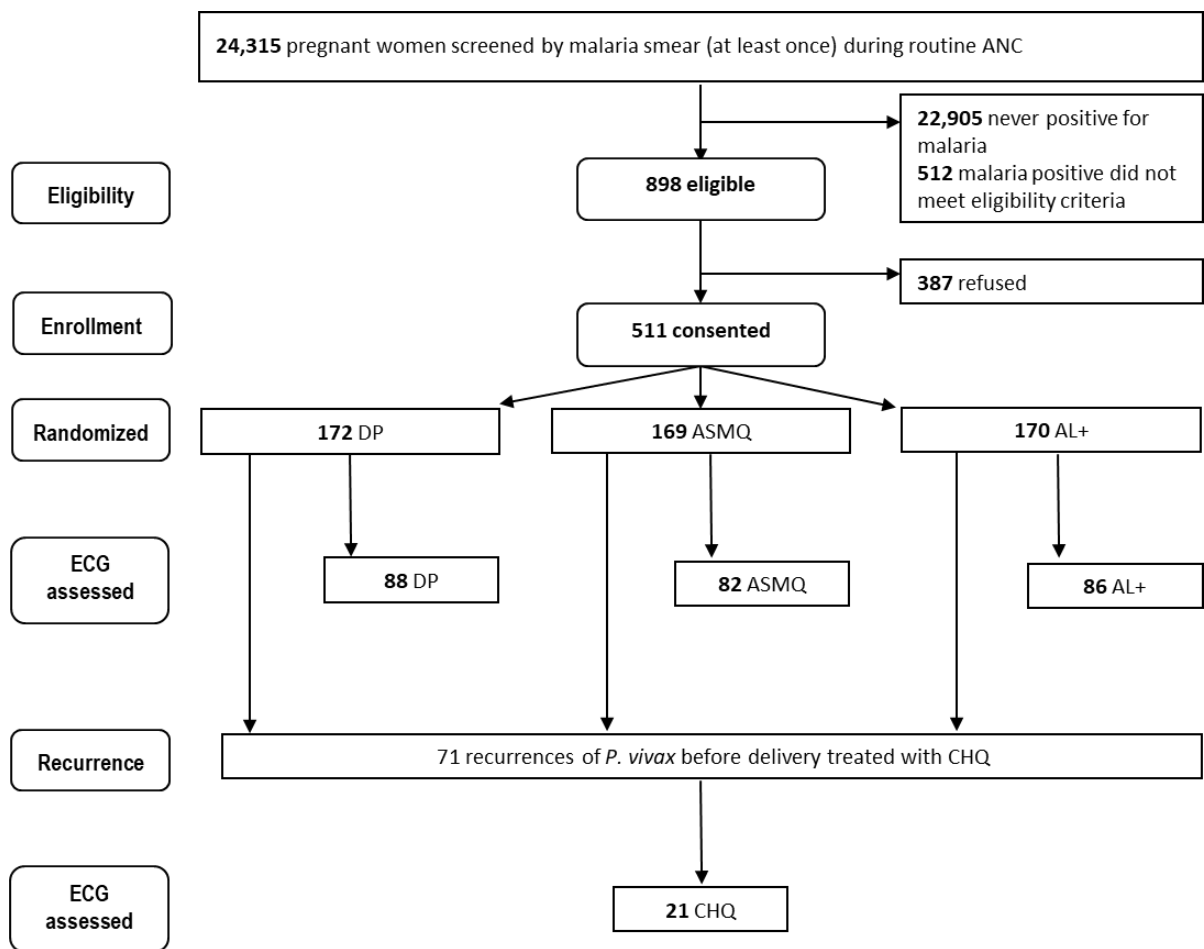

**Supplementary Figure 1. Flowchart of the pregnant women enrolled in the randomised controlled study and assessed for ECG**

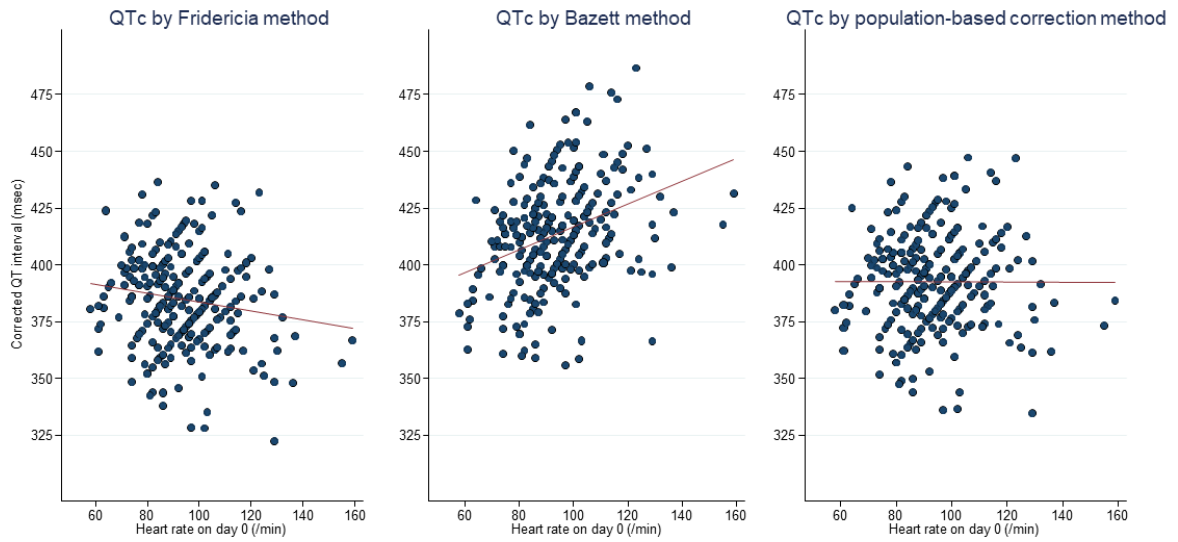

**Supplementary Figure 2. Comparison between corrected QT interval (QTc) by Fridericia, Bazett and population-based correction method**  
 Linear relationship remains after the Fridericia or Bazett correction, but not after population-based correction ( $QT/RR^{0.381}$ ).

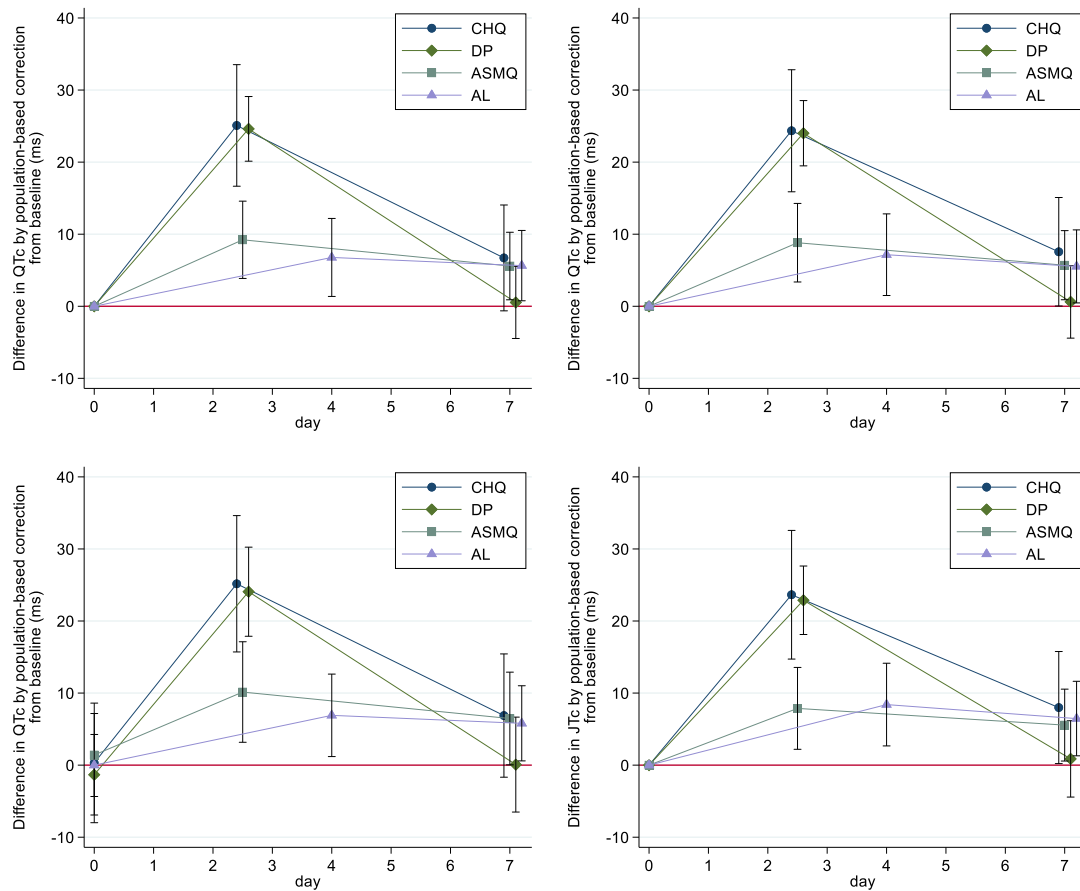

**Supplementary Figure 3. Adjusted QTc by population-based correction method over time by treatment in the final model and three sensitivity analysis models**

The main model adjusting for the baseline (top left, the same as Figure 2), a model excluding those who used concomitant medication (top right), a model allowing the baseline difference (bottom left), and a model with JTc interval as the outcome (bottom right).

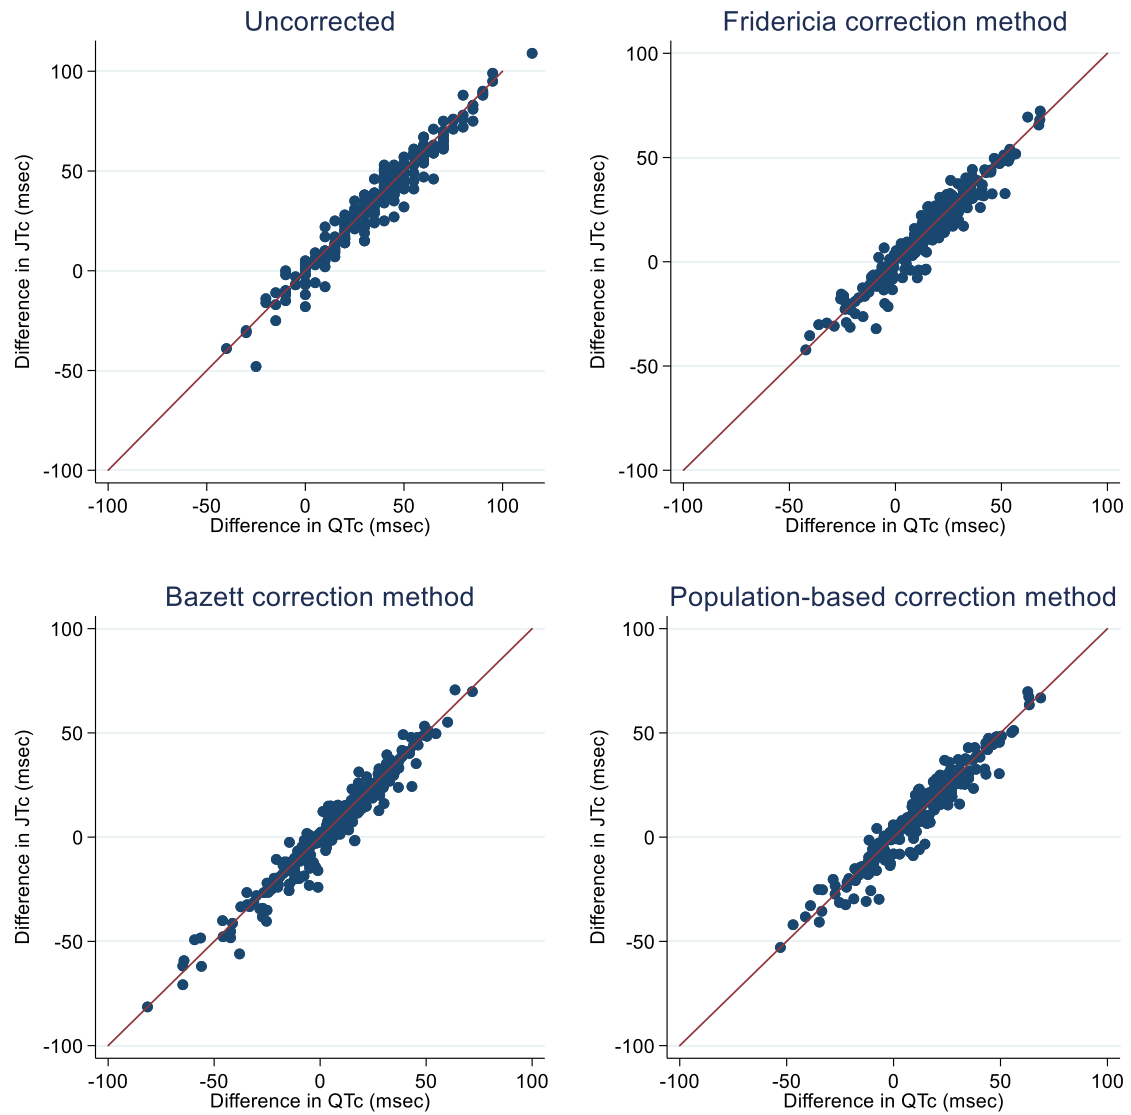

**Supplementary Figure 4. Difference in QT interval and JT interval on day peak from the baseline.**

QT and JT intervals are either uncorrected (top left), corrected by Fridericia method (top right), by Bazett method (bottom left), and by population-based correction method ( $QT/RR^{0.381}$ , bottom right). Red line shows  $y=x$ .
